# Supplementary material for: A Wastewater-based Epidemiology tool for COVID-19 Surveillance in Portugal
Source: bioRxiv or medRxiv preprint supplement (doi:10.1101/2021.07.21.21260905), 2021-07-22
Supplement: Supplementary file [file media-1.pdf]

**Table S1.** Description of the WWTPs sampled in this study.

| WWTP         | Projected Flow (m <sup>3</sup> /day) | Mean Flow (m <sup>3</sup> /day) | Estimated Population served | Municipalities served (% of population served by WWTP)                  |
|--------------|--------------------------------------|---------------------------------|-----------------------------|-------------------------------------------------------------------------|
| Alcântara    | 181,453                              | 122,127                         | 756,000                     | Amadora (45%)<br>Lisbon (55%)<br>Oeiras (19%)                           |
| Beirolas     | 54,500                               | 36,746                          | 213,510                     | Lisbon (12%)<br>Loures (46%)                                            |
| Guia         | 172,800                              | 185,235                         | 903,000                     | Amadora (46%)<br>Cascais (98%)<br>Oeiras (64%)<br>Sintra (89%)          |
| Gaia Litoral | 66,700                               | 36,845                          | 300,000                     | Vila Nova de Gaia (57%)                                                 |
| Serzedelo    | 25,577                               | 18,778                          | 180,548                     | Guimarães (50%)<br>Póvoa do Lanhoso (3%)<br>Vila Nova de Famalicão (1%) |

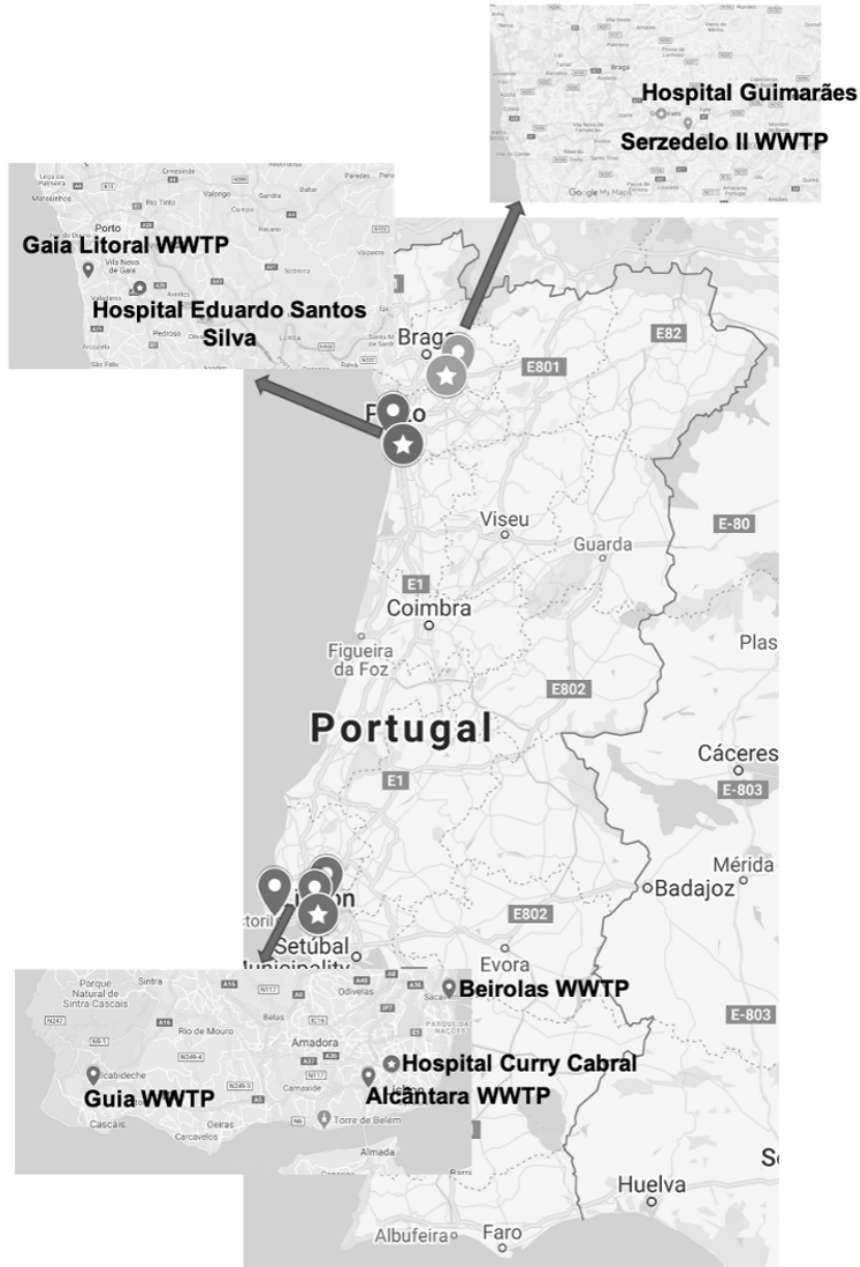

**Fig. S1.** Sampling location of the five WWTPs (bullets) and three COVID-19 hospitals (stars) monitored in this study.

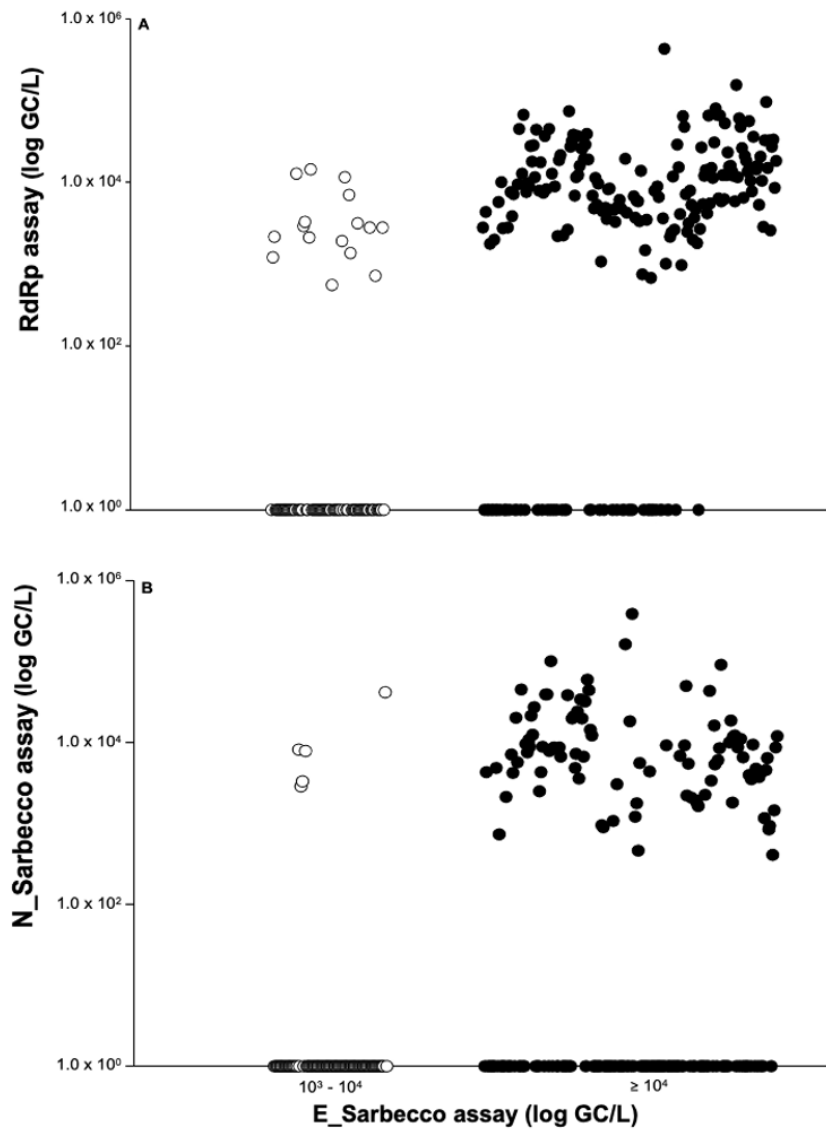

**Fig. S2.** Relationship between SARS-CoV-2 RNA concentration as detected by the E\_Sarbeco assay and the levels of detection for the (A) RdRp assay and (B) N\_Sarbeco assay. White dots represent samples positive for both assays, with E\_Sarbeco assay concentration varying between  $10^3$ - $10^4$  GC/L, while black dots represent samples positive for both assays at concentrations above  $10^4$  GC/L as measured by the E\_Sarbeco assay.

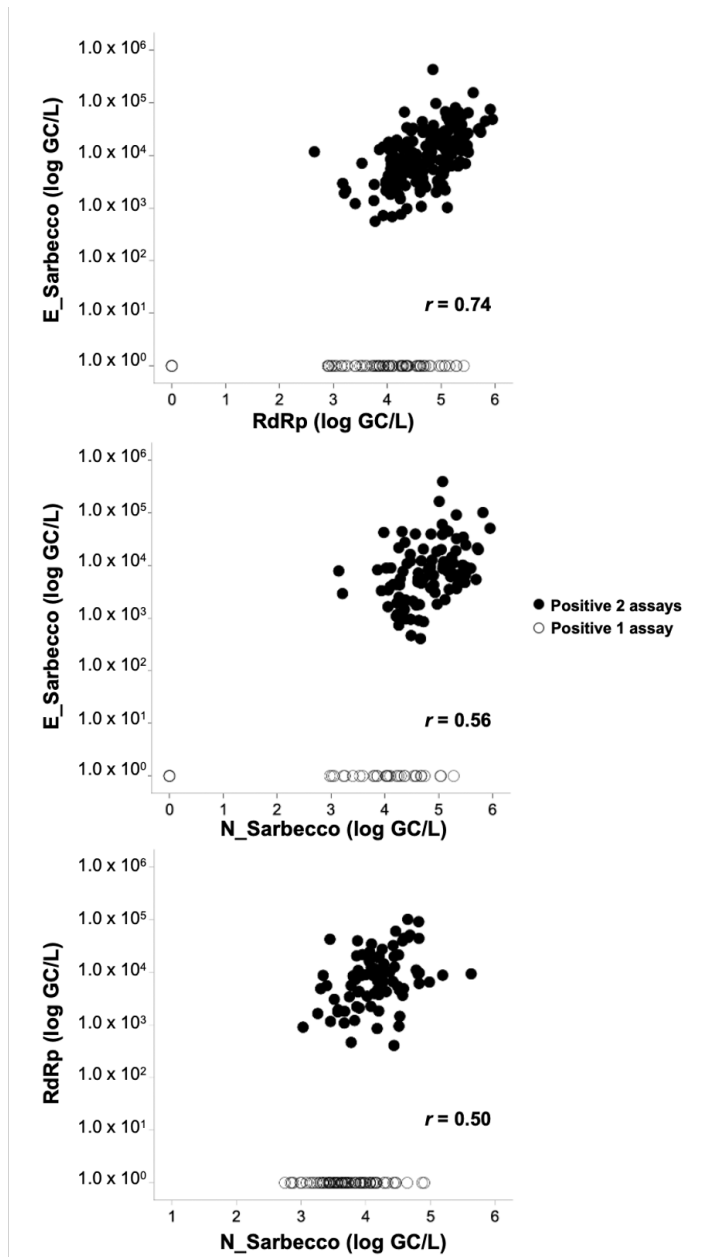

**Fig. S3.** Quantitative relationship of: E\_Sarbeco assay vs RdRp assay (A), E\_Sarbeco assay vs N\_Sarbeco assay (B), and RdRp assay vs N\_Sarbeco assay (C). Black dots correspond to samples positive for both assays, and white dots correspond to samples positive for a single assay. The coefficients for Spearman rank correlation order are given in the figure

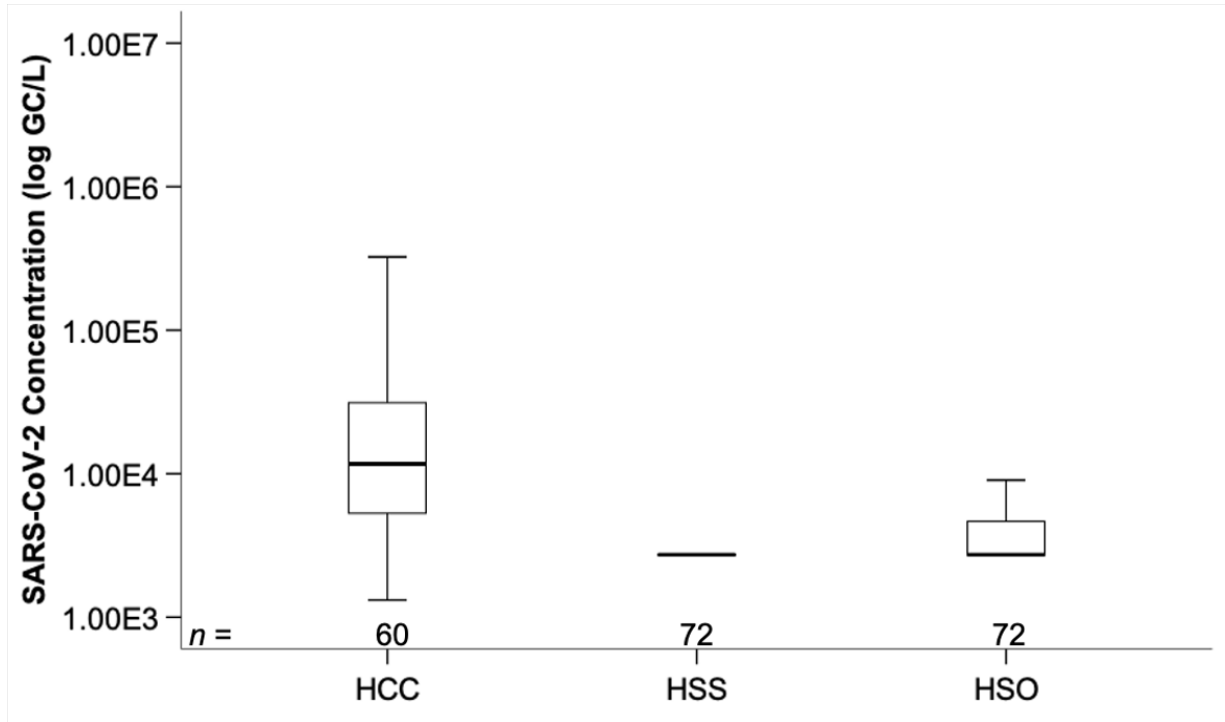

**Fig. S4.** Concentration of SARS-CoV-2 RNA determined at the three tested reference COVID-19 hospitals. HCC – Hospital Curry Cabral, HSS – Hospital Santos Silva, HSO -Hospital Sra. Oliveira.

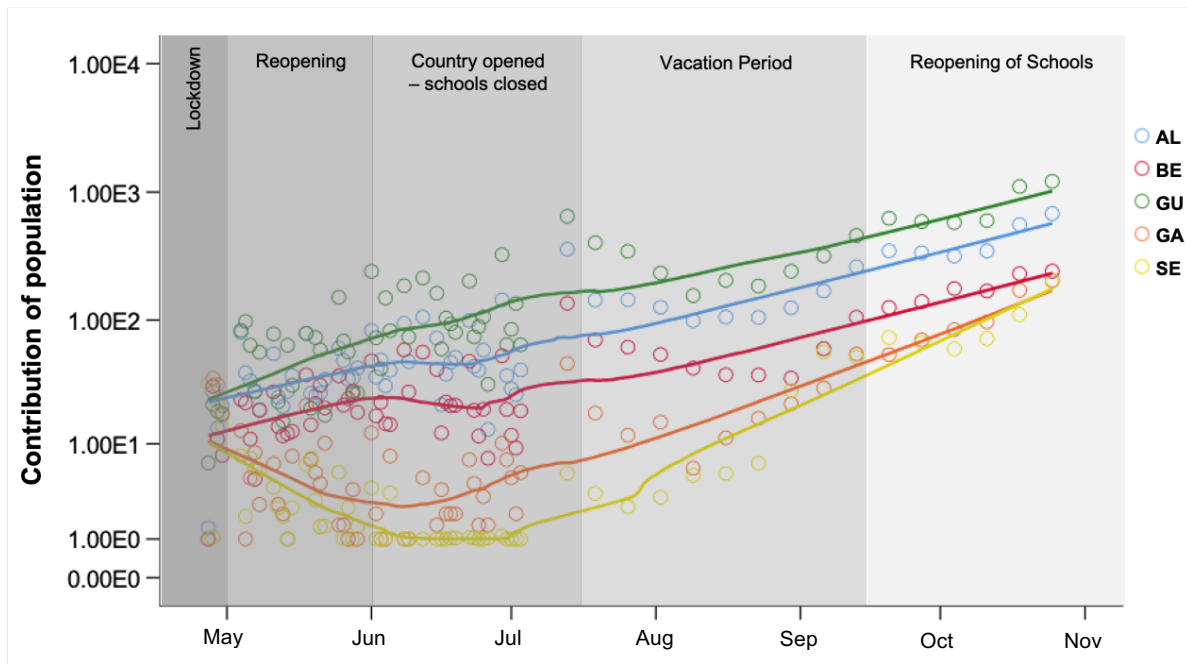

**Fig. S5.** Contribution of population to each WWTPs. The incidence rate at each WWTP was calculated by using the daily number of cases at each service area and using the percentage contribution (%) from each town to the WWTP. ALC – Alcântara; BE – Beirolas; GU – Guia; GA – Gaia Litoral; SE - Serzedelo

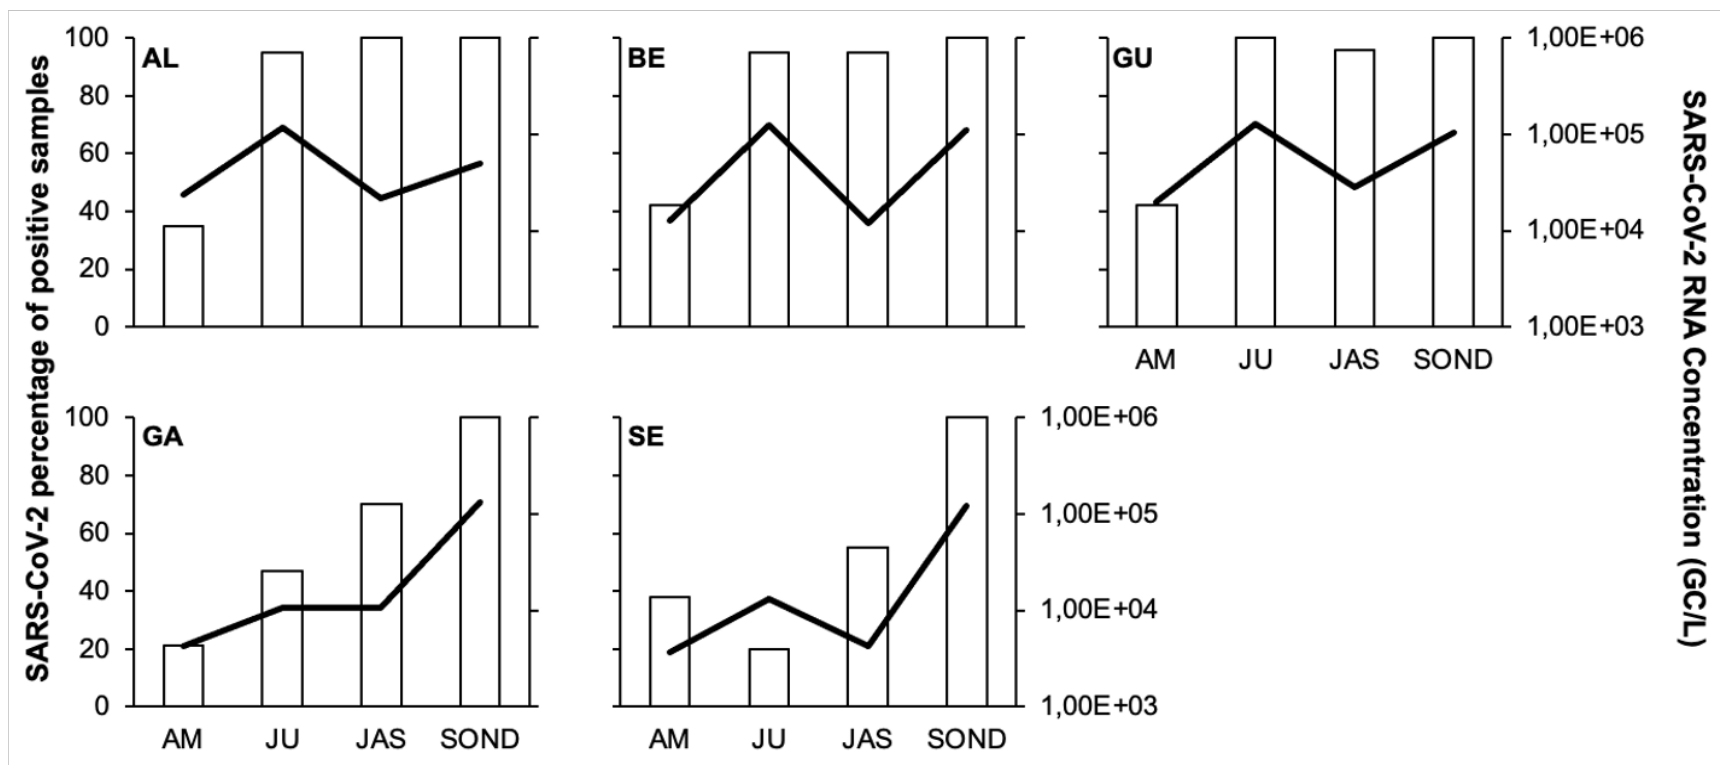

**Fig. S6.** Percentage of raw wastewater samples positive for SARS-CoV-2 and SARS-CoV-2 RNA geometric mean concentration in each WWTP (non-detected values and positive samples below the LoD were substituted by the LoD). AM- April-May; JU – June; JAS – July-August- until mid-September; SON – mid-September until the end of the study.

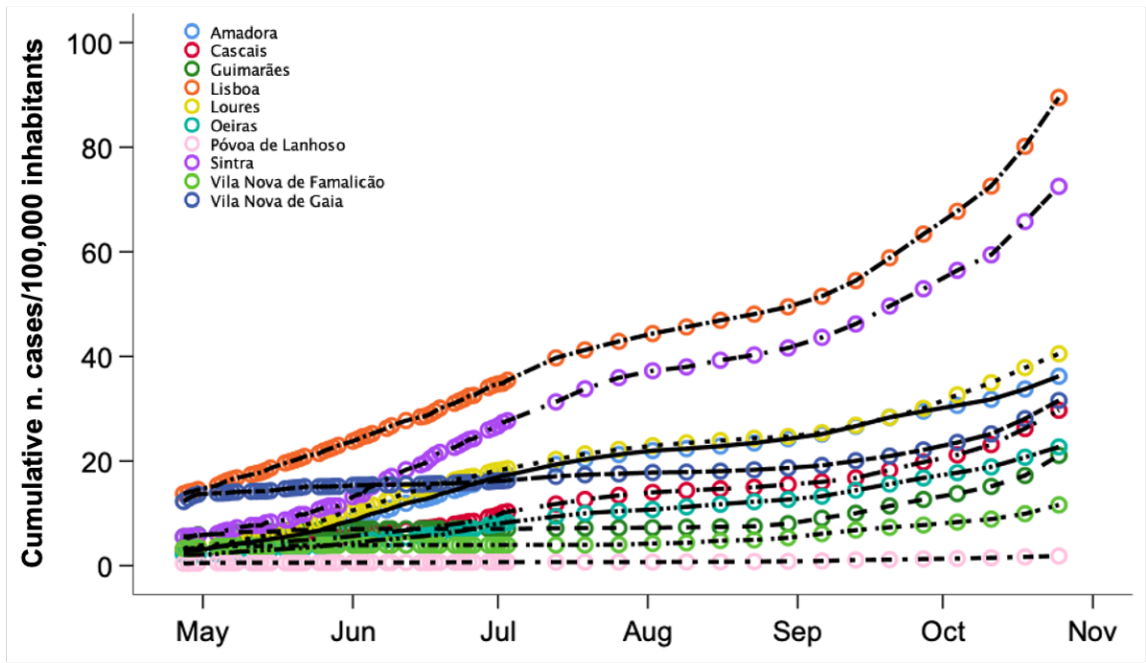

Fig. S7. Cumulative number of COVID-19 cases standardized by 100,000 population for the study period.
